# Supplementary material for: Dimensional evolution in hydrated K+-bearing uranyl sulfates: from 2D-sheets to 3D-frameworks
Source: Royal Society of Chemistry journal article supplement (doi:10.1039/d0ce00673d), 2020-01-01
Supplement: d0ce00673d1.pdf [file d0ce00673d1.pdf]

## Supplementary Information

**Table S1.** Crystallographic data and refinement parameters for compounds **2**, **3**, **5**, **6**, **7**, **8**.

| Compound                                                  | <b>2</b>                                                                                                     | <b>3</b>                                                                                                                 | <b>5</b>                                                                                 |
|-----------------------------------------------------------|--------------------------------------------------------------------------------------------------------------|--------------------------------------------------------------------------------------------------------------------------|------------------------------------------------------------------------------------------|
| Formula                                                   | $\text{K}_3(\text{H}_3\text{O})[(\text{UO}_2)_3(\text{SO}_4)_5(\text{H}_2\text{O})_2](\text{H}_2\text{O})_5$ | $\text{K}_{3.5}(\text{H}_3\text{O})_{0.5}[(\text{UO}_2)_3(\text{SO}_4)_5(\text{H}_2\text{O})](\text{H}_2\text{O})_{1.5}$ | $\text{K}_2[(\text{UO}_2)_2(\text{SO}_4)_3(\text{H}_2\text{O})_2](\text{H}_2\text{O})_3$ |
| Formula Weight                                            | 1552.69                                                                                                      | 1481.74                                                                                                                  | 996.44                                                                                   |
| Space Group                                               | $P2_1/n$                                                                                                     | $P2_1/n$                                                                                                                 | $P2_1/n$                                                                                 |
| Z                                                         | 4                                                                                                            | 4                                                                                                                        | 8                                                                                        |
| T, °C                                                     | 296                                                                                                          | 296                                                                                                                      | 296                                                                                      |
| a, Å                                                      | 12.774(4)                                                                                                    | 9.8901(3)                                                                                                                | 17.3051(2)                                                                               |
| b, Å                                                      | 11.339(3)                                                                                                    | 16.1105(5)                                                                                                               | 12.56130(10)                                                                             |
| c, Å                                                      | 20.734(6)                                                                                                    | 17.2862(5)                                                                                                               | 17.3240(2)                                                                               |
| $\alpha$ , °                                              | 90                                                                                                           | 90                                                                                                                       | 90                                                                                       |
| $\beta$ , °                                               | 92.088(6)                                                                                                    | 98.038(2)                                                                                                                | 96.5770(10)                                                                              |
| $\gamma$ , °                                              | 90                                                                                                           | 90                                                                                                                       | 90                                                                                       |
| V, Å <sup>3</sup>                                         | 3001.1(16)                                                                                                   | 2727.23(14)                                                                                                              | 3741.01(7)                                                                               |
| $\mu$ , mm <sup>-1</sup>                                  | 17.036                                                                                                       | 18.800                                                                                                                   | 18.172                                                                                   |
| 2 $\theta$ range, °                                       | 3.932–54.998                                                                                                 | 3.472–54.984                                                                                                             | 3.536–55.000                                                                             |
| D <sub>calc</sub> , g/cm <sup>3</sup>                     | 3.399                                                                                                        | 3.593                                                                                                                    | 3.503                                                                                    |
| Total ref.                                                | 25339                                                                                                        | 26393                                                                                                                    | 8580                                                                                     |
| Unique ref.                                               | 6880                                                                                                         | 6259                                                                                                                     | 8580                                                                                     |
| Unique $ F_o  \geq 4\sigma_F$                             | 5958                                                                                                         | 4615                                                                                                                     | 7674                                                                                     |
| R <sub>int</sub>                                          | 0.0378                                                                                                       | 0.0648                                                                                                                   | Merged*                                                                                  |
| R <sub>1</sub>                                            | 0.0252                                                                                                       | 0.0358                                                                                                                   | 0.0212                                                                                   |
| wR <sub>2</sub>                                           | 0.0530                                                                                                       | 0.0724                                                                                                                   | 0.0523                                                                                   |
| GOF                                                       | 1.045                                                                                                        | 1.036                                                                                                                    | 1.034                                                                                    |
| $\rho_{\text{max}}, \rho_{\text{min}}$ , e/Å <sup>3</sup> | 1.49 / -1.01                                                                                                 | 1.73 / -1.62                                                                                                             | 1.38/-0.91                                                                               |
| CSD                                                       | 1996652                                                                                                      | 1996653                                                                                                                  | 1996656                                                                                  |

**Table S1.** Continued.

| Compound                                                           | 6                                                                                        | 7                                                                                    | 8                                                                                    |
|--------------------------------------------------------------------|------------------------------------------------------------------------------------------|--------------------------------------------------------------------------------------|--------------------------------------------------------------------------------------|
| Formula                                                            | $\text{K}_2[(\text{UO}_2)_2(\text{SO}_4)_3(\text{H}_2\text{O})_2](\text{H}_2\text{O})_3$ | $\text{K}_2[(\text{UO}_2)_2(\text{SO}_4)_3(\text{H}_2\text{O})](\text{H}_2\text{O})$ | $\text{K}(\text{H}_5\text{O}_2)[(\text{UO}_2)_2(\text{SO}_4)_3(\text{H}_2\text{O})]$ |
| Formula Weight                                                     | 996.44                                                                                   | 942.47                                                                               | 922.40                                                                               |
| Space Group                                                        | <i>Pnma</i>                                                                              | <i>P2<sub>1</sub>/c</i>                                                              | <i>P2<sub>1</sub>/c</i>                                                              |
| Z                                                                  | 4                                                                                        | 4                                                                                    | 4                                                                                    |
| T, °C                                                              | 296                                                                                      | 100                                                                                  | 296                                                                                  |
| a, Å                                                               | 11.465(7)                                                                                | 8.229(6)                                                                             | 11.1337(15)                                                                          |
| b, Å                                                               | 12.605(7)                                                                                | 14.862(10)                                                                           | 10.0463(13)                                                                          |
| c, Å                                                               | 12.944(8)                                                                                | 13.921(14)                                                                           | 14.697(2)                                                                            |
| $\alpha$ , °                                                       | 90                                                                                       | 90                                                                                   | 90                                                                                   |
| $\beta$ , °                                                        | 90                                                                                       | 92.921(14)                                                                           | 101.280(3)                                                                           |
| $\gamma$ , °                                                       | 90                                                                                       | 90                                                                                   | 90                                                                                   |
| V, Å <sup>3</sup>                                                  | 1870.7(19)                                                                               | 1626.8(19)                                                                           | 1612.2(4)                                                                            |
| $\mu$ , mm <sup>-1</sup>                                           | 18.171                                                                                   | 20.871                                                                               | 20.809                                                                               |
| 2 $\theta$ range, °                                                | 4.51–54.994                                                                              | 4.11–54.98                                                                           | 3.73–54.998                                                                          |
| D <sub>calc</sub> , g/cm <sup>3</sup>                              | 3.503                                                                                    | 3.848                                                                                | 3.800                                                                                |
| Total ref.                                                         | 14744                                                                                    | 9109                                                                                 | 28887                                                                                |
| Unique ref.                                                        | 2237                                                                                     | 3728                                                                                 | 3707                                                                                 |
| Unique<br>$ F_o  \geq 4\sigma_F$                                   | 1719                                                                                     | 3092                                                                                 | 3514                                                                                 |
| R <sub>int</sub>                                                   | 0.0532                                                                                   | 0.0334                                                                               | 0.0267                                                                               |
| R <sub>1</sub>                                                     | 0.0291                                                                                   | 0.0238                                                                               | 0.0126                                                                               |
| wR <sub>2</sub>                                                    | 0.0560                                                                                   | 0.0431                                                                               | 0.0298                                                                               |
| GOF                                                                | 1.064                                                                                    | 0.986                                                                                | 1.120                                                                                |
| $\rho_{\text{max}}$ ,<br>$\rho_{\text{min}}$ ,<br>e/Å <sup>3</sup> | 1.19/-1.15                                                                               | 1.12/-0.98                                                                           | 0.84/-0.46                                                                           |
| CSD                                                                | 1996654                                                                                  | 1996651                                                                              | 1996655                                                                              |

\*The compound 5 was refined using twin law with the creation of HKLF5-type reflection file. MERG code changed to 0 for compatibility with HKLF and BASF parameters.

## Infrared Spectroscopy

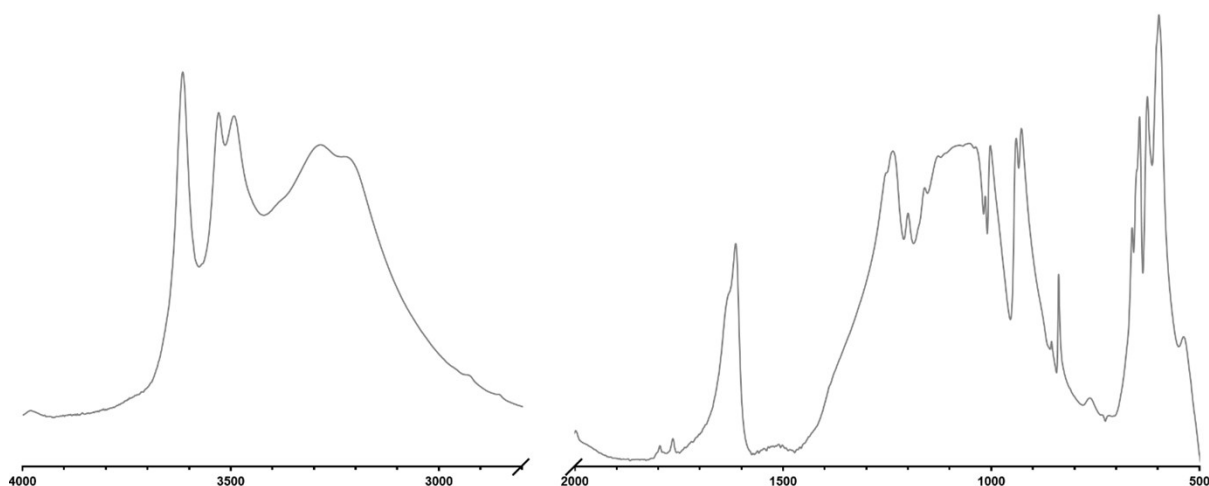

**Figure S1.** Infrared spectroscopy for compound 7.

The IR spectrum of **7** (Figure S1) was recorded using KBr pellets on the Bruker Vertex 70 spectrometer via Attenuated Total Reflection method in the region 4000-500  $\text{cm}^{-1}$ . A MIRacle ATR accessory (Pike Technologies) with a Ge ATR crystal was used. In order to subtract the baseline and integrate peaks, the spectrum was processed using OriginPro software.

Infrared bands at 3615, 3528, 3492, 3284 and 3227  $\text{cm}^{-1}$  are assigned to the  $\nu$  O–H stretching vibrations of symmetrically nonequivalent  $\text{H}_2\text{O}$  molecules. According to the correlation given by Libowitzky (1999), listed values of infrared bands correspond to the O–H $\cdots$ O hydrogen bond distances range between 3.2 to 2.7 Å, which is in a good agreement with the values obtained from single crystal X-ray analysis (3.190–2.735 Å). Two infrared bands at 1634 and 1613  $\text{cm}^{-1}$  are attributed to the  $\nu_2$  ( $\delta$ ) bending vibrations of structurally non-equivalent  $\text{H}_2\text{O}$  molecules.

There are ten bands in the spectrum in the range from 1300 to 1000  $\text{cm}^{-1}$  which are assigned to stretching vibrations of  $(\text{SO}_4)^{2-}$  groups. The bands at 1257, 1236, 1199, 1160, 1127, 1076 and 1053 are attributed to the split triply degenerate  $\nu_3$  antisymmetric stretching vibrations, whereas next three bands at 1037, 1014 and 1001  $\text{cm}^{-1}$  are assigned to the  $\nu_1$  symmetric stretching vibrations. Two strong bands at 940 and 927  $\text{cm}^{-1}$  are attributed to the  $\nu_3$  antisymmetric

stretching vibrations of the uranyl ion,  $\text{UO}_2^{2+}$ . Next two weak bands at 855 and 838  $\text{cm}^{-1}$  are assigned to the  $\nu_1$  symmetric stretching vibrations of uranyl ion. A broad weak band at 763  $\text{cm}^{-1}$  may be associated with the libration modes of  $\text{H}_2\text{O}$  molecules. Medium-strong infrared bands at 661, 643 and 624  $\text{cm}^{-1}$  are attributed to the  $\nu_4$  ( $\delta$ ) triply degenerate antisymmetric stretching vibrations of  $\text{SO}_4$  tetrahedra. The strongest band among all the spectrum at 596  $\text{cm}^{-1}$  is assigned to the split triply degenerate  $\nu_4$  ( $\delta$ ) bending vibrations of  $\text{SO}_4$ .
